# Supplementary material for: Effects of prebiotics, probiotics and synbiotics on serum creatinine in non-dialysis patients: a meta-analysis of randomized controlled trials
Source: PubMed Central journal article supplement (PMC9848283; doi:10.1080/0886022x.2022.2152693), 2023-01-13
Supplement: IRNF_A_2152693_SM7738.pdf [file IRNF_A_2152693_SM7738.pdf]

## Supplementary Table 1. Search strategy in CENTRAL, PubMed and EMBASE databases

| <b>CENTRAL</b>                                                                                                                                                                                                                                                                                                                                                                                                                                                                                                                                                                                                                                                                                                                                                          |
|-------------------------------------------------------------------------------------------------------------------------------------------------------------------------------------------------------------------------------------------------------------------------------------------------------------------------------------------------------------------------------------------------------------------------------------------------------------------------------------------------------------------------------------------------------------------------------------------------------------------------------------------------------------------------------------------------------------------------------------------------------------------------|
| #1 MeSH descriptor: [Prebiotics] explode all trees                                                                                                                                                                                                                                                                                                                                                                                                                                                                                                                                                                                                                                                                                                                      |
| #2 MeSH descriptor: [Probiotics] explode all trees                                                                                                                                                                                                                                                                                                                                                                                                                                                                                                                                                                                                                                                                                                                      |
| #3 MeSH descriptor: [Synbiotics] explode all trees                                                                                                                                                                                                                                                                                                                                                                                                                                                                                                                                                                                                                                                                                                                      |
| #4 MeSH descriptor: [Lactobacillus] explode all trees                                                                                                                                                                                                                                                                                                                                                                                                                                                                                                                                                                                                                                                                                                                   |
| #5 MeSH descriptor: [Inulin] explode all trees                                                                                                                                                                                                                                                                                                                                                                                                                                                                                                                                                                                                                                                                                                                          |
| #6 MeSH descriptor: [Bifidobacterium] explode all trees                                                                                                                                                                                                                                                                                                                                                                                                                                                                                                                                                                                                                                                                                                                 |
| #7 (probiotic or probiotics or prebiotics or prebiotic or synbiotics or synbiotics or lactobacillus or lactobacilli or bifidobacterium or bifidobacteria or oligofructose or inulin):ti,ab,kw (Word variations have been searched)                                                                                                                                                                                                                                                                                                                                                                                                                                                                                                                                      |
| #8 MeSH descriptor: [Creatinine] explode all trees                                                                                                                                                                                                                                                                                                                                                                                                                                                                                                                                                                                                                                                                                                                      |
| #9 (creatinine):ti,ab,kw (Word variations have been searched)                                                                                                                                                                                                                                                                                                                                                                                                                                                                                                                                                                                                                                                                                                           |
| #10 #1 OR #2 OR #3 OR #4 OR #5 OR #6 OR #7                                                                                                                                                                                                                                                                                                                                                                                                                                                                                                                                                                                                                                                                                                                              |
| #11 #8OR #9                                                                                                                                                                                                                                                                                                                                                                                                                                                                                                                                                                                                                                                                                                                                                             |
| #12 #10 AND #11                                                                                                                                                                                                                                                                                                                                                                                                                                                                                                                                                                                                                                                                                                                                                         |
| <b>PubMed</b>                                                                                                                                                                                                                                                                                                                                                                                                                                                                                                                                                                                                                                                                                                                                                           |
| (((((((((((((((((((((Probiotics[MeSH Terms]) OR (Probiotics[Text Word])) OR (Probiotic[Text Word])) OR (Prebiotics[MeSH Terms])) OR (Prebiotics[Text Word])) OR (Prebiotic[Text Word])) OR (Synbiotics[MeSH Terms])) OR (Synbiotics[Text Word])) OR (Synbiotic[Text Word])) OR (Lactobacillus[MeSH Terms])) OR (Lactobacillus[Text Word])) OR (Lactobacilli[Text Word])) OR (Bifidobacterium[MeSH Terms])) OR (Bifidobacterium[Text Word])) OR (bifidobacteria[Text Word])) OR (oligofructose[Text Word])) OR (Inulin[MeSH Terms])) OR (Inulin[Text Word])) AND ((creatinine[MeSH Terms]) OR (creatinine[Text Word])) AND (((Randomized Controlled Trial[MeSH Terms]) OR (Randomized Controlled Trial[Text Word])) OR (Randomized[Text Word])) OR (placebo[Text Word])) |
| <b>EMBASE</b>                                                                                                                                                                                                                                                                                                                                                                                                                                                                                                                                                                                                                                                                                                                                                           |
| #1. 'prebiotics' OR 'prebiotic':ab,kw,ti                                                                                                                                                                                                                                                                                                                                                                                                                                                                                                                                                                                                                                                                                                                                |
| #2. 'synbiotics' OR 'synbiotic':ab,kw,ti                                                                                                                                                                                                                                                                                                                                                                                                                                                                                                                                                                                                                                                                                                                                |
| #3. 'probiotics' OR 'probiotic':ab,kw,ti                                                                                                                                                                                                                                                                                                                                                                                                                                                                                                                                                                                                                                                                                                                                |
| #4. 'lactobacillus'/exp OR 'lactobacillus':ab,kw,ti                                                                                                                                                                                                                                                                                                                                                                                                                                                                                                                                                                                                                                                                                                                     |
| #5. 'lactobacilli':ab,kw,ti                                                                                                                                                                                                                                                                                                                                                                                                                                                                                                                                                                                                                                                                                                                                             |
| #6. 'bifidobacterium'/exp OR 'bifidobacterium' OR 'bifidobacteria':ab,kw,ti                                                                                                                                                                                                                                                                                                                                                                                                                                                                                                                                                                                                                                                                                             |
| #7. 'oligofructose'/exp OR 'oligofructose':ab,kw,ti                                                                                                                                                                                                                                                                                                                                                                                                                                                                                                                                                                                                                                                                                                                     |
| #8. 'inulin'/exp OR 'inulin':ab,kw,ti                                                                                                                                                                                                                                                                                                                                                                                                                                                                                                                                                                                                                                                                                                                                   |
| #9. e'cr atinine'/exp OR creatinine                                                                                                                                                                                                                                                                                                                                                                                                                                                                                                                                                                                                                                                                                                                                     |
| #10. 'randomized controlled trial':ab,kw,ti                                                                                                                                                                                                                                                                                                                                                                                                                                                                                                                                                                                                                                                                                                                             |
| #11. 'randomized controlled trial'/exp                                                                                                                                                                                                                                                                                                                                                                                                                                                                                                                                                                                                                                                                                                                                  |
| #12. #1 OR #2 OR #3 OR #4 OR #5 OR #6 OR #7 OR #8                                                                                                                                                                                                                                                                                                                                                                                                                                                                                                                                                                                                                                                                                                                       |
| #13. #10 OR #11                                                                                                                                                                                                                                                                                                                                                                                                                                                                                                                                                                                                                                                                                                                                                         |
| #14. #9 AND #12 AND #13                                                                                                                                                                                                                                                                                                                                                                                                                                                                                                                                                                                                                                                                                                                                                 |
